# Supplementary material
Source: ML conference proceedings conference paper supplement (https://aclanthology.org/2026.semeval-1.176)

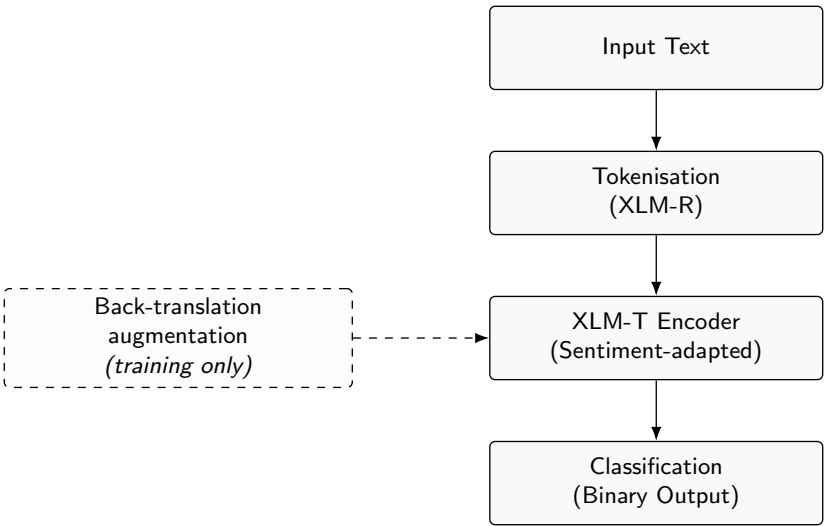

Supplement: SupplementaryMaterial [file pipeline.pdf › latex/figures/pipeline.pdf]
